# Supplementary material for: Microfluidic Synthesis of Scalable Layer-by-Layer Multiple Antigen Nano-Delivery Platform for SARS-CoV-2 Vaccines
Source: MDPI journal article supplement (doi:10.3390/vaccines12030339), 2024-03-21
Supplement: s1 [file s1]

## Supplementary Materials

**Table S1A: A 4-Week Study of LbL-CoV19 by Intramuscular Injection in Rats with a 4-Week Recovery Period (GLP)**

| Group No. | Test Article | Dose Level (µg*/kg/day) | Dose Volume (mL/kg) | Dose Conc. (µg*/mL) | Main Study   |                | Recovery Study |                |
|-----------|--------------|-------------------------|---------------------|---------------------|--------------|----------------|----------------|----------------|
|           |              |                         |                     |                     | No. of Males | No. of Females | No. of Males   | No. of Females |
| 1         | Control      | 0                       | 0.2                 | 0                   | 10           | 10             | 6              | 6              |
| 2         | LbL-CoV-19   | 10                      |                     | 50                  | 10           | 10             | 6              | 6              |
| 3         |              | 50                      |                     | 250                 | 10           | 10             | 6              | 6              |
| 4         |              | 100                     |                     | 500                 | 10           | 10             | 6              | 6              |

**Table S1B: Maximum tolerated dose study for LbL-CoV-19 in rabbits (non-GLP)**

### Phase A:

| Group No. | Test Article | Dose Level (µg*/kg) | Dose Volume (mL/kg) | Dose Concentration (µg*/mL) | Main Study   |                |
|-----------|--------------|---------------------|---------------------|-----------------------------|--------------|----------------|
|           |              |                     |                     |                             | No. of Males | No. of Females |
| 1         | Dose Level 1 | 5                   | 0.25                | 20                          | 1            | 1              |
| 2         | Dose Level 2 | 10                  |                     | 40                          | 1            | 1              |
| 3         | Dose Level 3 | 25                  |                     | 100                         | 1            | 1              |
| 4         | Dose Level 4 | 50                  |                     | 200                         | 1            | 1              |

<sup>a</sup> Based on most recent body weight measurement; \* Based on antigen mass only.

### Phase B:

| Group No. | Test Article | Dose Level (µg*/kg/dose) | Dose Volume <sup>a</sup> (mL/kg) | Dose Concentration (µg*/mL) | Toxicokinetic Study |                |
|-----------|--------------|--------------------------|----------------------------------|-----------------------------|---------------------|----------------|
|           |              |                          |                                  |                             | No. of Males        | No. of Females |
| 5         | Control      | 0                        | 0.25                             | 0                           | 2                   | 2              |
| 6         | Vaccine      | 5                        |                                  | 20                          | 2                   | 2              |
| 7         |              | 25                       |                                  | 100                         | 2                   | 2              |
| 8         |              | 50                       |                                  | 200                         | 2                   | 2              |

<sup>a</sup> Based on most recent body weight measurement; \* Based on antigen mass only.

Table S2: Title: Parameters of LbL nanoparticle synthesis using a microfluidic device.

| Sample No. | TMC conc. (mg/mL) | TMC vol. (mL) | TPP conc. (mg/mL) | TPP vol. (mL) | TMC/ TPP ratio | Total vol (mL) | TMC flow (mL/min) | TPP flow (mL/min) | Total flow (mL/min) | Size peak (nm)    | Average size (nm) |
|------------|-------------------|---------------|-------------------|---------------|----------------|----------------|-------------------|-------------------|---------------------|-------------------|-------------------|
| 1          | 2                 | 1             | 2                 | 0.2           | 5:1            | 1.2            | 5                 | 1                 | 6                   | 469.5             | 381               |
| 2          | 2                 | 1             | 2                 | 0.2           | 5:1            | 1.2            | 2.5               | 0.5               | 3                   | 193, 22, 5        | 47                |
| 3          | 1                 | 1             | 2                 | 0.1           | 5:1            | 1.1            | 10                | 1                 | 11                  | 180.2, 12.3       | 102               |
| 4          | 2                 | 1             | 4                 | 0.1           | 5:1            | 1.1            | 10                | 1                 | 11                  | 209.1, 10.7       | 300               |
| 5          | 2                 | 1.5           | 4                 | 0.15          | 5:1            | 1.65           | 10                | 1                 | 11                  | 131.5, 13.7, 2979 | 27                |
| 6          | 2                 | 1             | 4                 | 0.1           | 5:1            | 1.1            | 8                 | 0.8               | 8.8                 | 520.1             | 395               |
| 7          | 2                 | 1             | 4                 | 0.1           | 5:1            | 1.1            | 9                 | 0.9               | 9.9                 | 160.6, 14.9, 4901 | 62                |
| 8          | 2                 | 1             | 4                 | 0.1           | 5:1            | 1.1            | 8.5               | 0.85              | 9.35                | 511.1, 5181       | 415               |
| 9          | 2                 | 1             | 4                 | 0.1           | 5:1            | 1.1            | 8                 | 0.8               | 8.8                 | 569.4             | 467               |
| 10         | 2                 | 1             | 4                 | 0.1           | 5:1            | 1.1            | 7.5               | 0.75              | 8.25                | 512.5             | 413               |
| 11         | 2                 | 1             | 4                 | 0.1           | 5:1            | 1.1            | 7                 | 0.7               | 7.7                 | 577.7             | 454               |
| 12         | 2                 | 1             | 4                 | 0.1           | 5:1            | 1.1            | 6                 | 0.6               | 6.6                 | 158.7, 8, 40.0    | 164               |
